# Supplementary material for: Histone degradation in response to DNA damage enhances chromatin dynamics and recombination rates
Source: Springer Nature journal article supplement (doi:10.1038/nsmb.3347), 2017-01-09

Fig. 1b

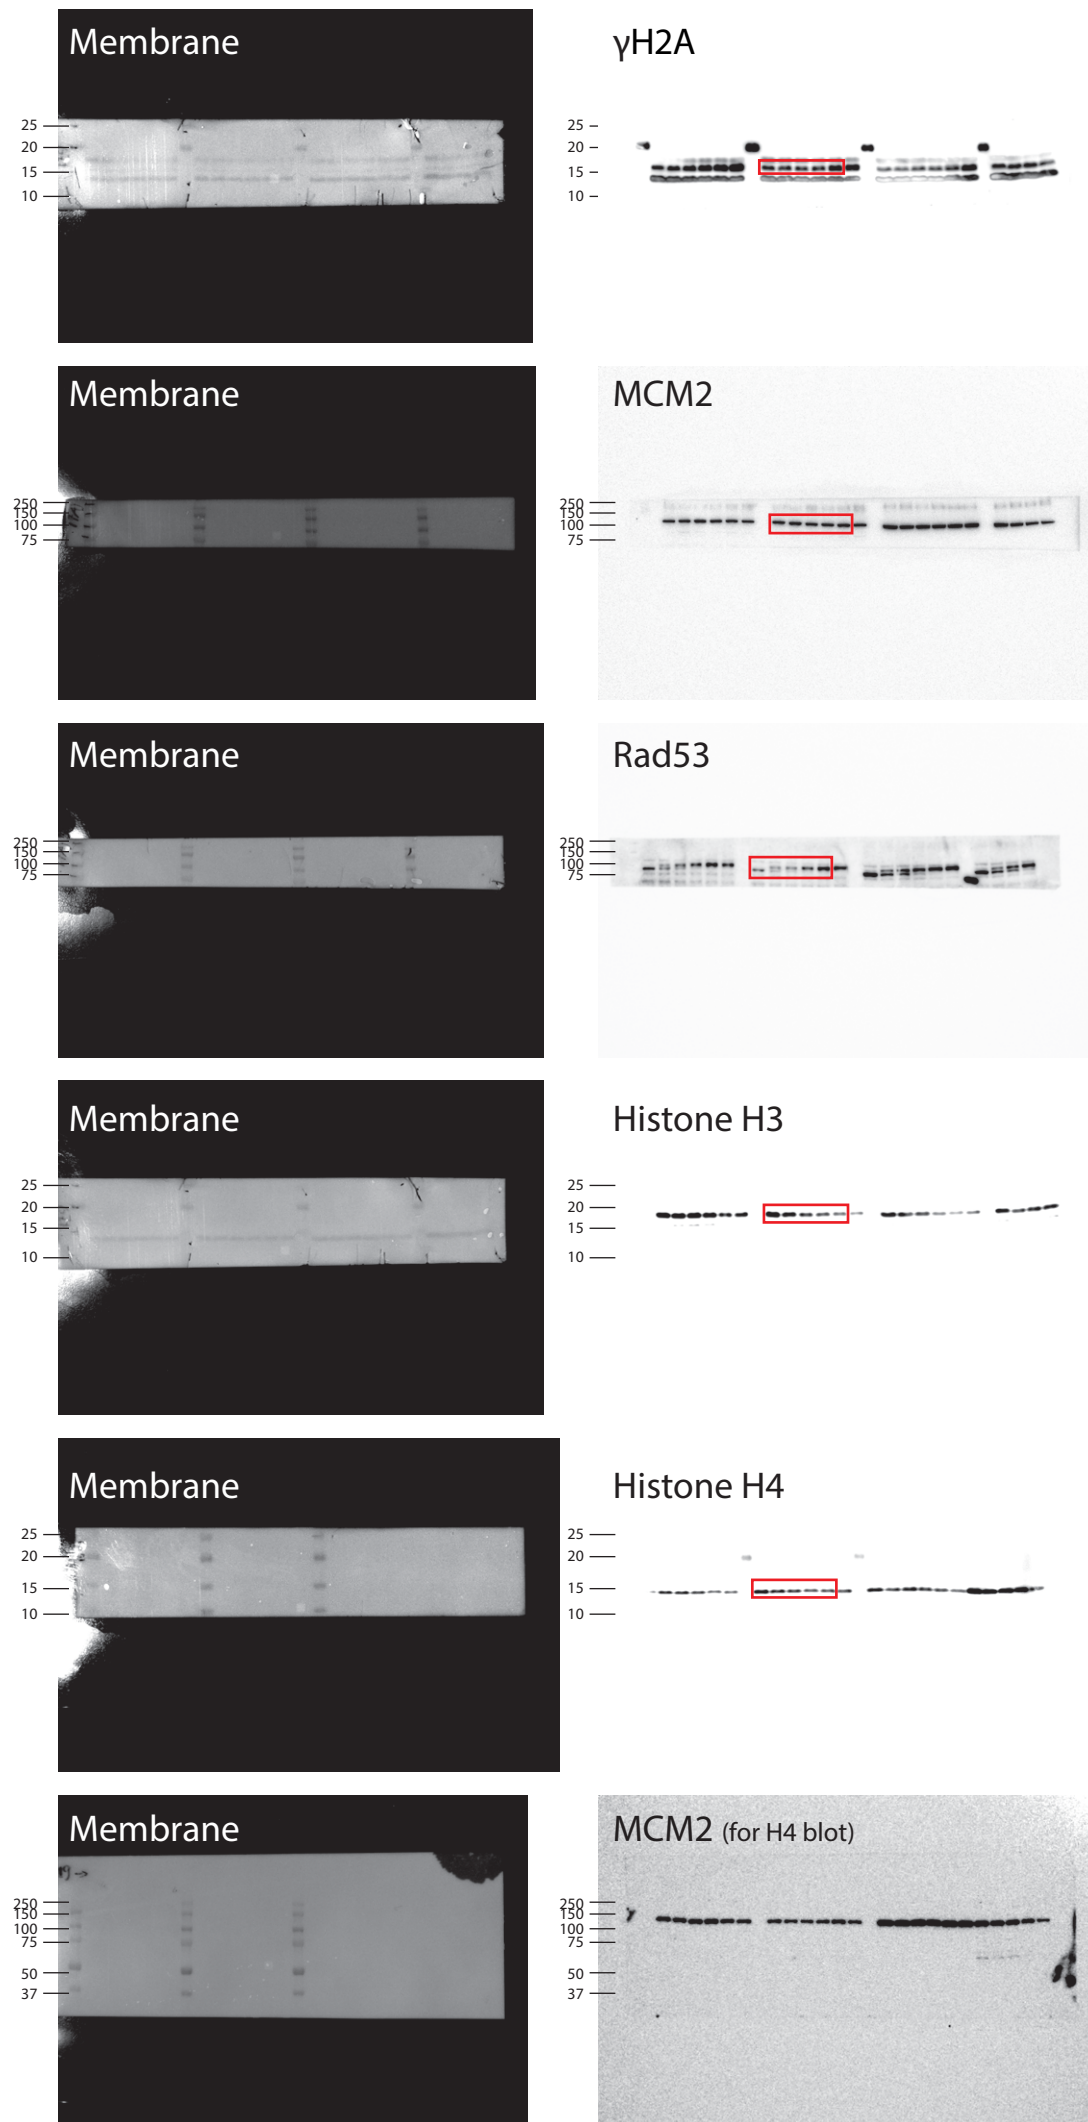

Fig. 1b

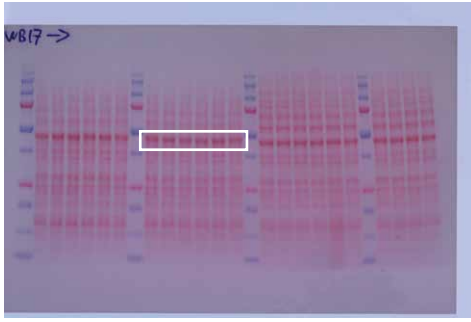

Ponceau stained membrane  
after transfer

Fig. 2a

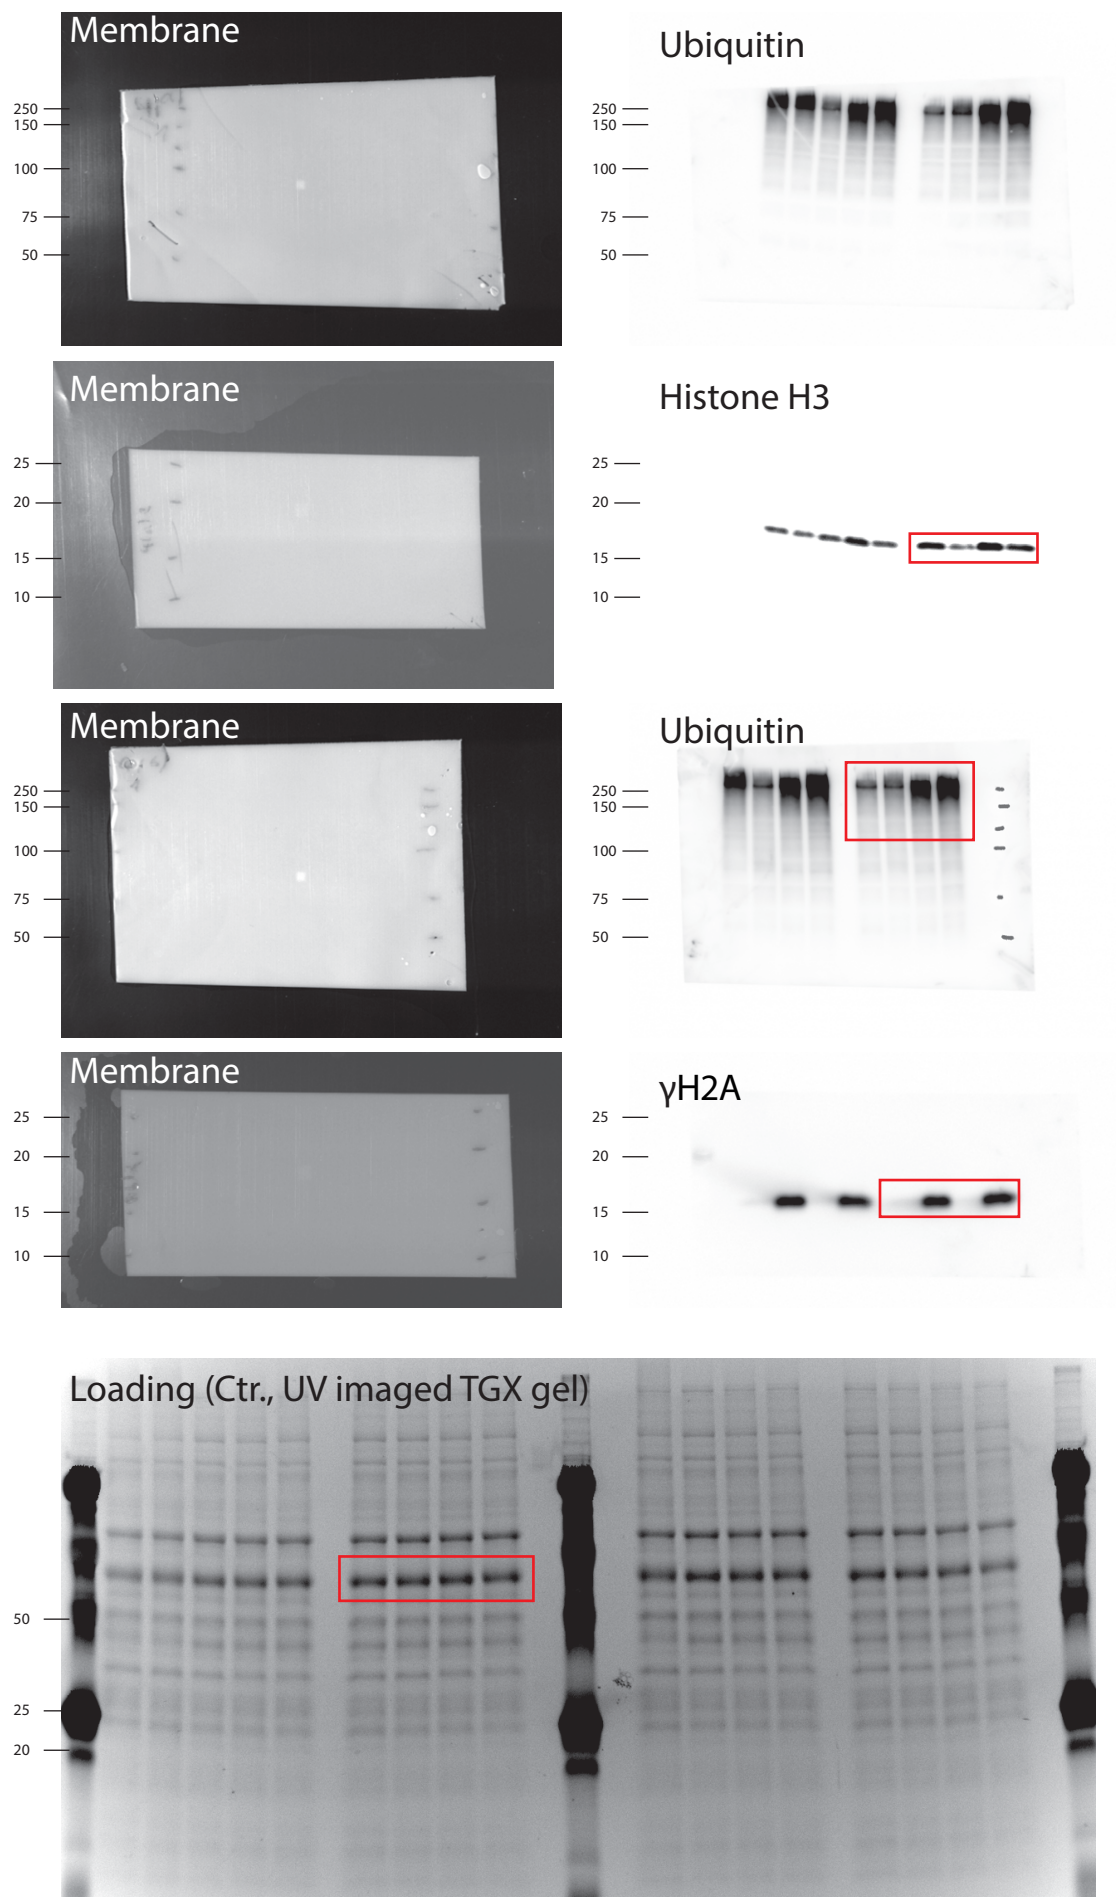

Fig. 2b

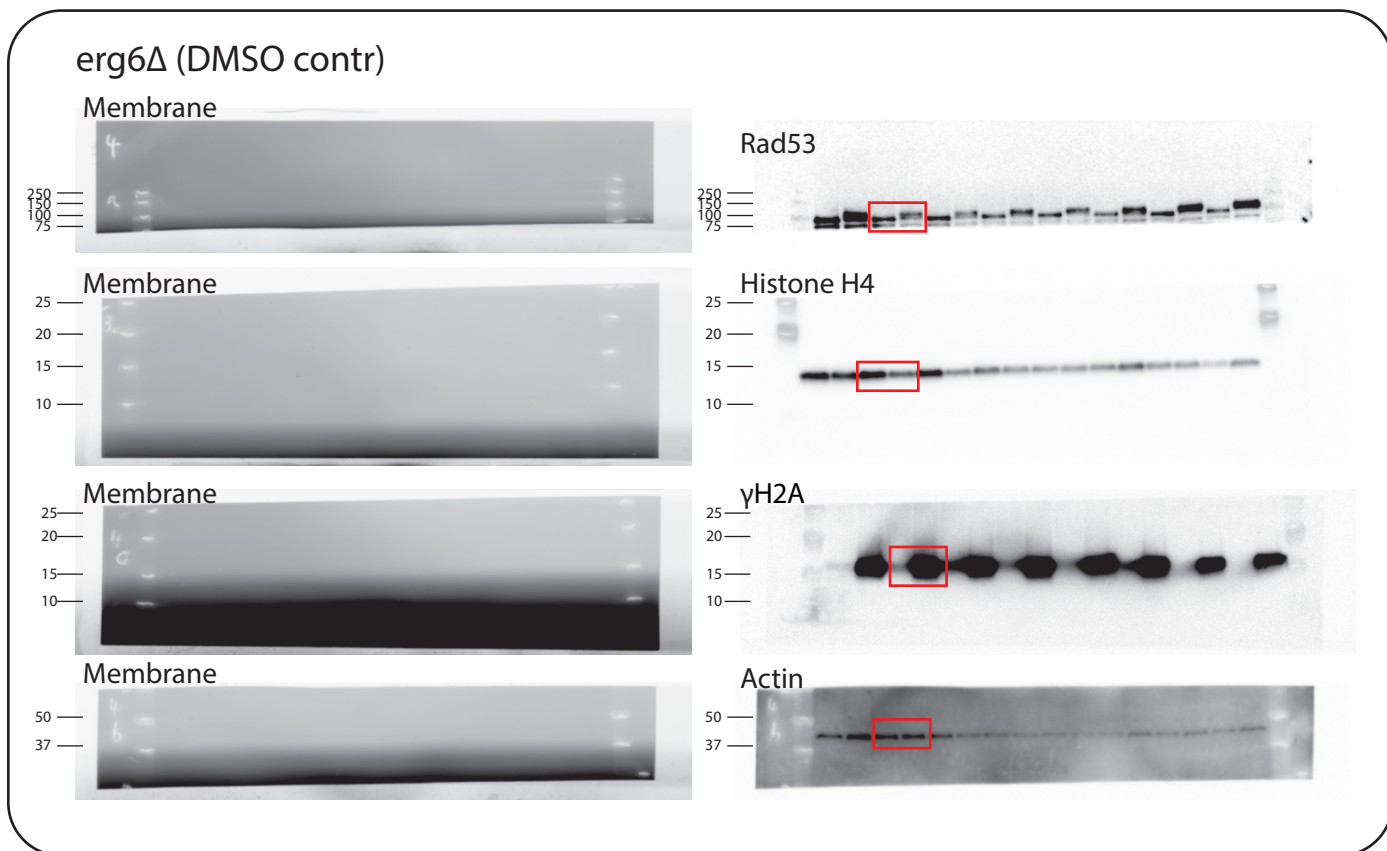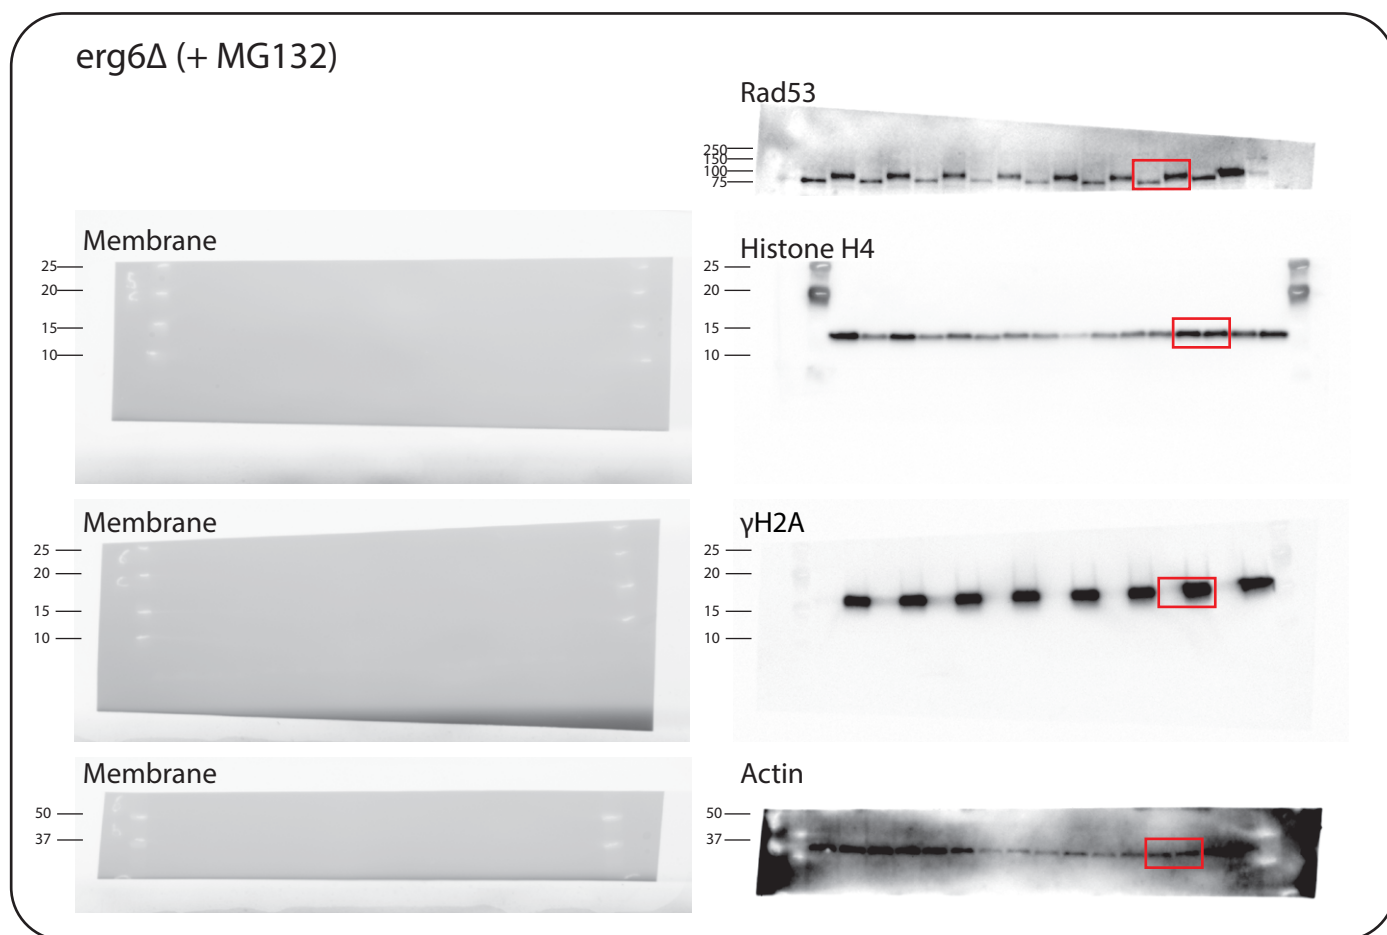

Fig. 2c

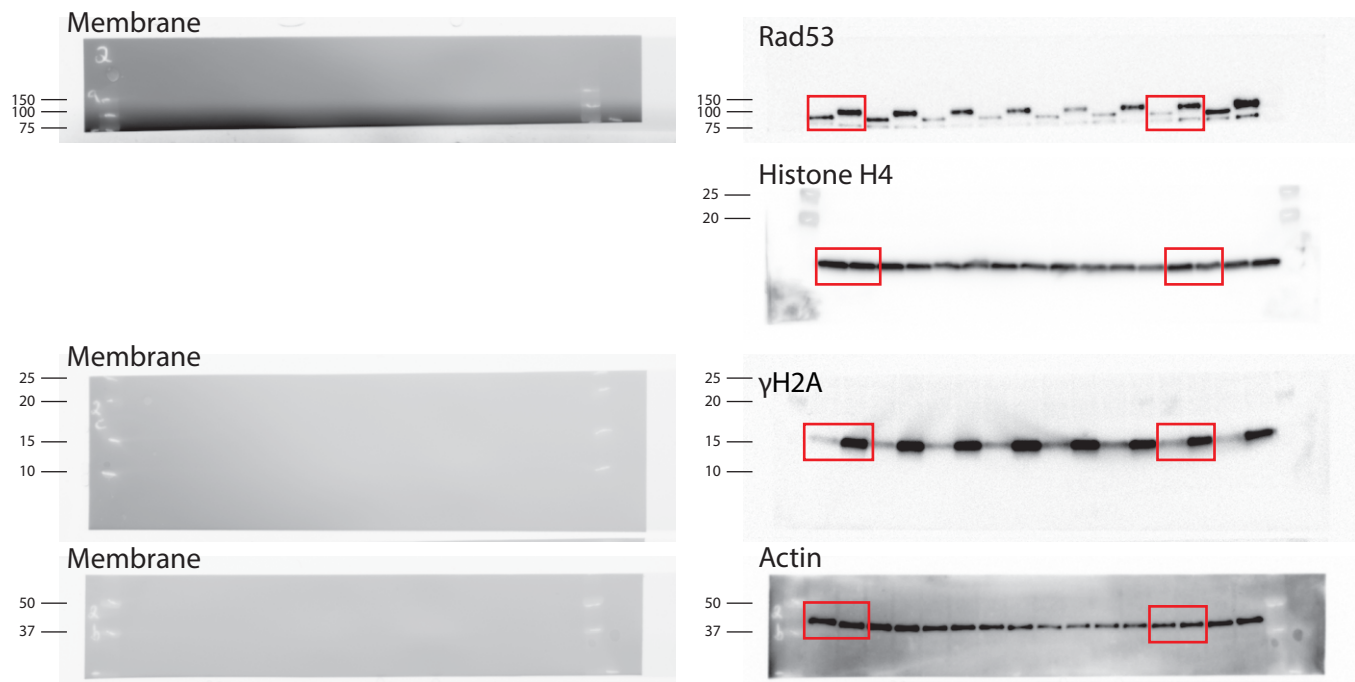

Fig. 7a

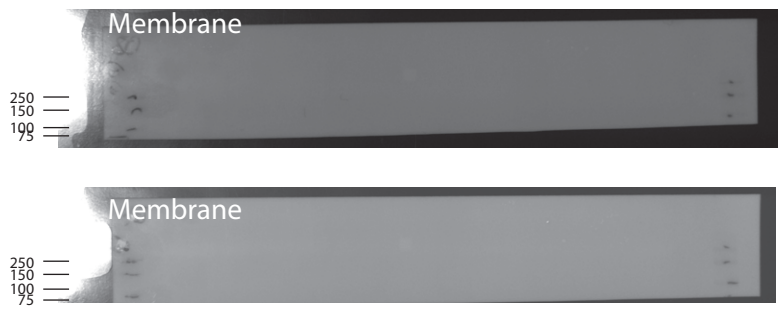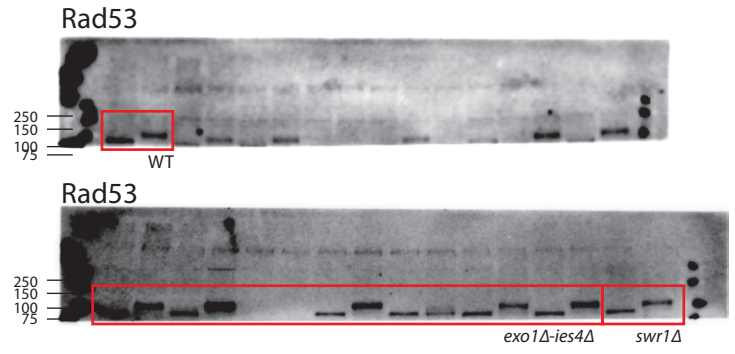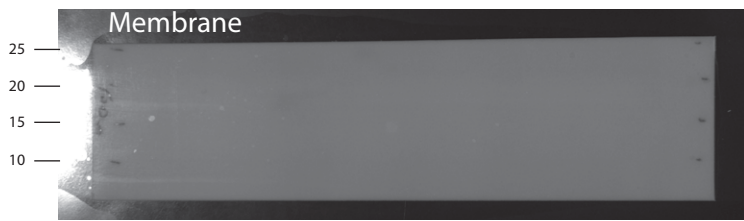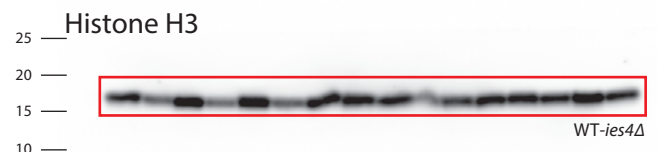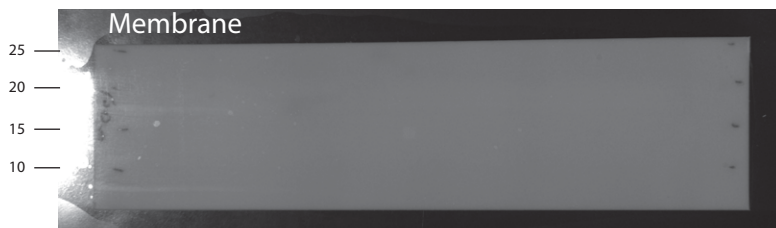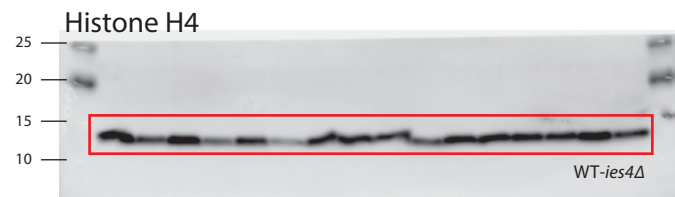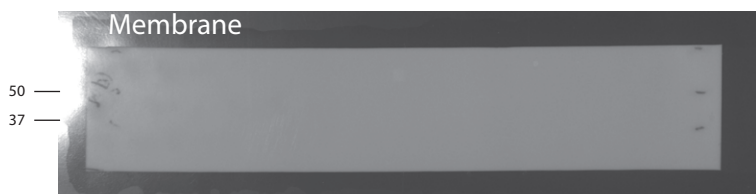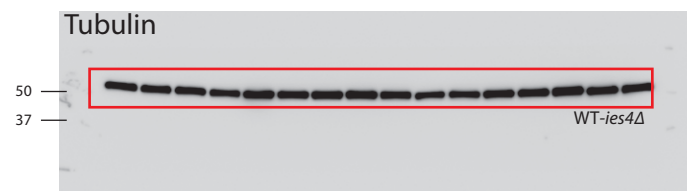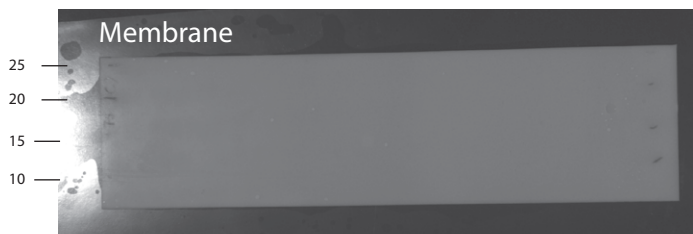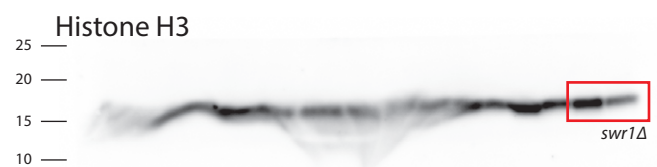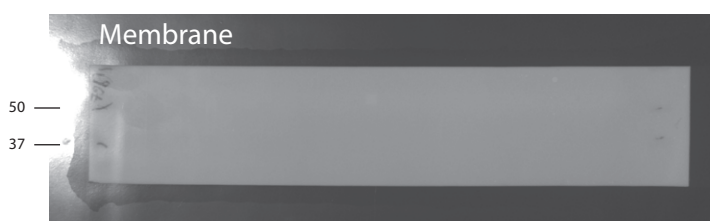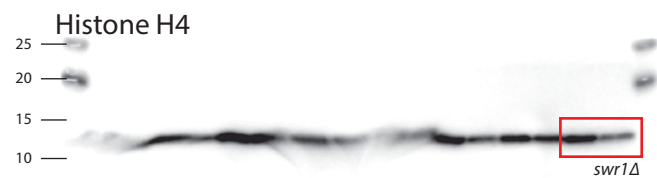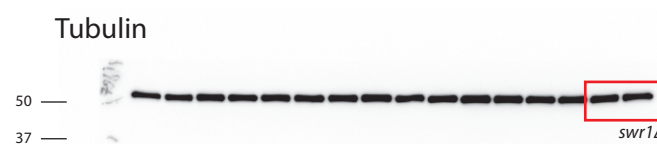

Fig. 7a

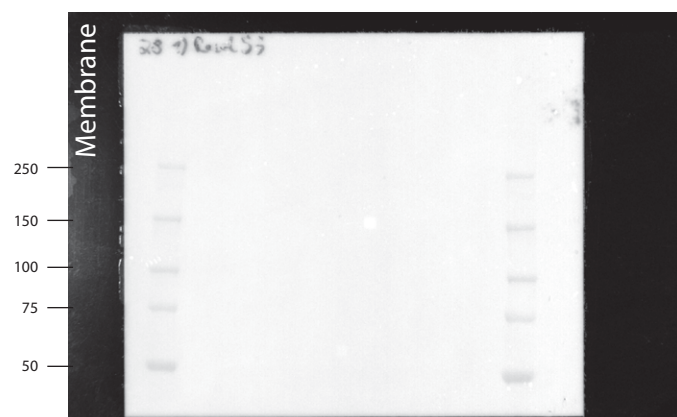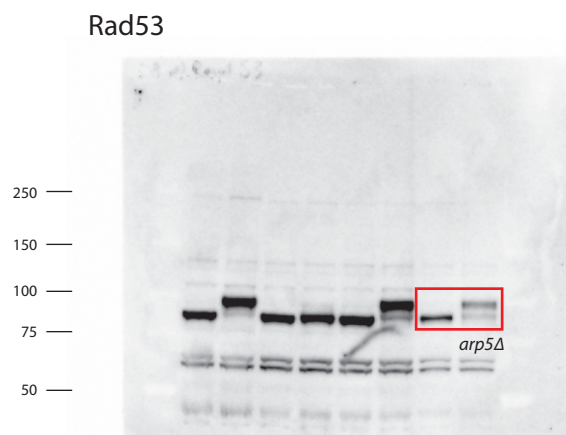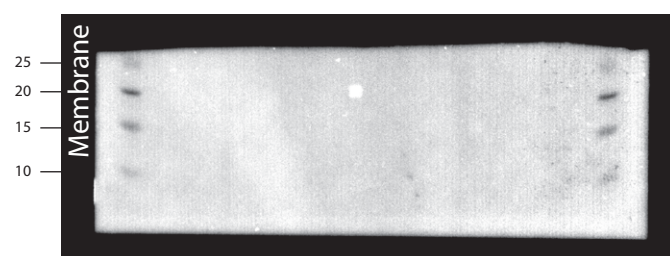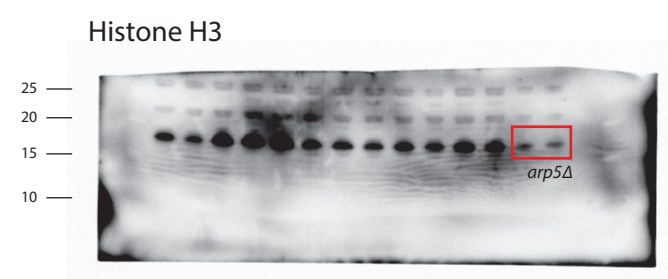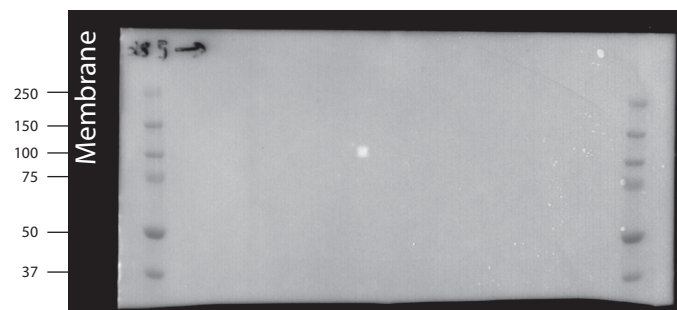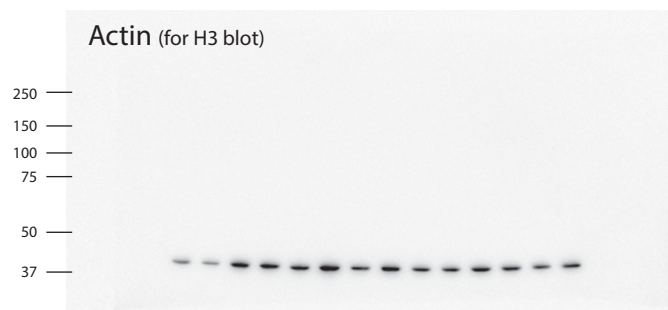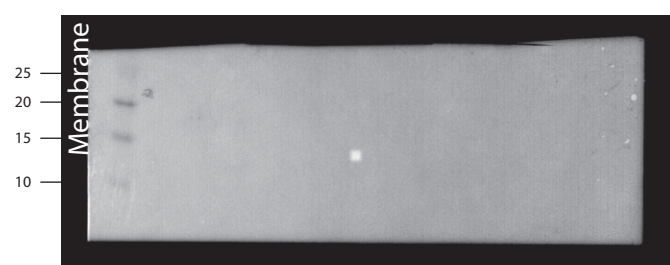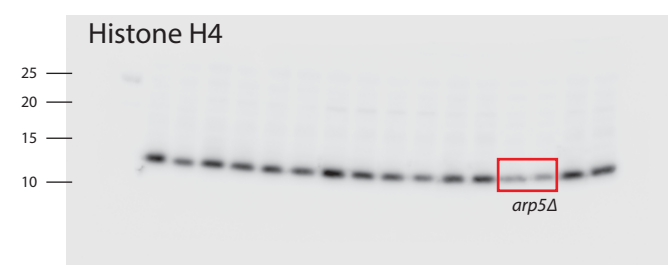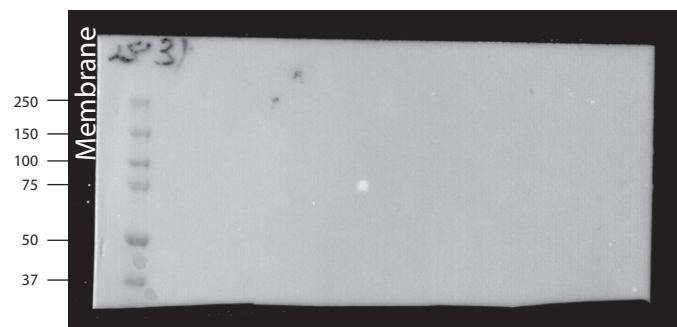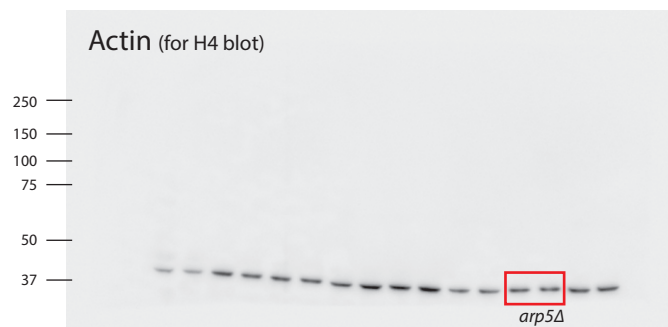

Supplement: 41594_2017_BFnsmb3347_MOESM23_ESM.pdf [file 41594_2017_BFnsmb3347_MOESM23_ESM.pdf]
